# Supplementary material
Source: publisher figshare collection journal article supplement (https://sage.figshare.com/ndownloader/files/17822951)
Supplement: Supplementary file 1 [file 17822951]

Supplemental Table 4. Differences in measures of depressive symptoms (QoL-AD) by reported importance (Yes vs. No or somewhat important) and experience (N-S: No/not at all or some vs. Yes)

| Item                                                                               | Important: Very |      |                    | Important: Not/Some |      |                    | Interaction |
|------------------------------------------------------------------------------------|-----------------|------|--------------------|---------------------|------|--------------------|-------------|
|                                                                                    | N-S             | Yes  | Diff. <sup>a</sup> | N-S                 | Yes  | Diff. <sup>a</sup> | Sig.        |
| <b>Domain 1: Physical Environment</b>                                              |                 |      |                    |                     |      |                    |             |
| a. Your room is arranged and decorated the way you want it?                        | 2.45            | 2.83 | .39*               | 2.47                | 2.70 | .22*               | .16         |
| b. You enjoy the view from their window?                                           | 2.57            | 2.67 | .09                | 2.55                | 2.73 | .18                | -.09        |
| c. You feel welcome in areas outside of your room?                                 | 2.49            | 2.74 | .25                | 2.35                | 2.55 | .20                | .04         |
| d. You easily get around outside of your room?                                     | 2.45            | 2.76 | .31**              | 2.44                | 2.50 | .05                | .25         |
| e. You go outdoors?                                                                | 2.39            | 2.80 | .41**              | 2.52                | 2.69 | .17                | .24         |
| f. It is peaceful here?                                                            | 2.36            | 2.76 | .41***             | 2.61                | 2.76 | .15                | .26         |
| g. It feels like home here?                                                        | 2.54            | 2.87 | .33*               | 2.56                | 2.81 | .25                | .09         |
| <b>Domain 2: Meaningful Activity</b>                                               |                 |      |                    |                     |      |                    |             |
| a. Do the things you care about?                                                   | 2.48            | 2.89 | .41***             | 2.41                | 2.71 | .29*               | .12         |
| b. Do things with other people who live here?                                      | 2.47            | 2.89 | .42**              | 2.56                | 2.75 | .20*               | .22         |
| c. Do things just for fun?                                                         | 2.65            | 2.87 | .22*               | 2.39                | 2.64 | .26*               | -.04        |
| d. Do physical activities (e.g., exercise classes, go on walks, work on strength)? | 2.66            | 2.70 | .04                | 2.54                | 2.77 | .24                | -.20        |
| e. Take care of plants?                                                            | 2.43            | 2.70 | .27                | 2.68                | 2.75 | .07                | .20         |
| f. Spend time with animals?                                                        | 2.48            | 2.72 | .24                | 2.69                | 2.79 | .10                | .14         |
| g. Listen to or make music that you like?                                          | 2.41            | 2.81 | .40*               | 2.65                | 2.60 | -.05               | .45*        |
| h. Do things to help others who live or work here?                                 | 2.67            | 2.78 | .10                | 2.50                | 2.71 | .21                | -.11        |
| i. Share your wisdom with the people who work here (e.g., advice)?                 | 2.39            | 2.78 | .38***             | 2.61                | 2.60 | -.01               | .40         |
| j. Have a purpose in life?                                                         | 2.49            | 2.77 | .29***             | 2.32                | 2.79 | .47*               | -.19        |
| <b>Domain 3: Personalized Care</b>                                                 |                 |      |                    |                     |      |                    |             |
| a. Take into account your health needs?                                            | 2.22            | 2.73 | .51***             | 2.20                | 2.82 | .62*               | -.12        |

|                                                                                                                                       | Important: Very |      |                    | Important: Not/Some |      |                    | Interaction |
|---------------------------------------------------------------------------------------------------------------------------------------|-----------------|------|--------------------|---------------------|------|--------------------|-------------|
|                                                                                                                                       | N-S             | Yes  | Diff. <sup>a</sup> | N-S                 | Yes  | Diff. <sup>a</sup> | Sig.        |
| b. Respond quickly to your requests (e.g., to ease your pain, to use the toilet?)                                                     | 2.45            | 2.82 | .37***             | 2.57                | 2.65 | .08                | .29         |
| c. Make you feel at ease when they are helping you (e.g., to get dressed, in the bathroom)?                                           | 2.24            | 2.76 | .51***             | 2.49                | 2.55 | .06                | .45         |
| d. Tell you how long you have to wait if they can't help you right away?                                                              | 2.40            | 2.88 | .48***             | 2.63                | 2.67 | .04                | .44**       |
| e. Take the time with you that you need?                                                                                              | 2.38            | 2.76 | .38**              | 2.51                | 2.72 | .21                | .17         |
| f. Make you feel comfortable asking for help?                                                                                         | 2.27            | 2.76 | .50**              | 2.42                | 2.64 | .22                | .28         |
| g. Make sure that you can hear what they say?                                                                                         | 2.37            | 2.75 | .38*               | 2.09                | 2.59 | .50**              | -.11        |
| h. Are gentle when they are helping you or doing things for you (e.g., to get dressed, in the bathroom)?                              | 2.26            | 2.74 | .48***             | 2.60                | 2.66 | .06                | .42         |
| <b>Domain 4: Knowing the Person</b>                                                                                                   |                 |      |                    |                     |      |                    |             |
| a. How you like to have things done?                                                                                                  | 2.43            | 2.76 | .32*               | 2.60                | 2.64 | .04                | .28         |
| b. The kinds of things you are interested in?                                                                                         | 2.46            | 2.79 | .33                | 2.52                | 2.83 | .31***             | .02         |
| c. How you like to spend your time?                                                                                                   | 2.63            | 2.85 | .22*               | 2.39                | 2.70 | .31*               | -.09        |
| d. What makes a good day for you?                                                                                                     | 2.42            | 2.83 | .41**              | 2.46                | 2.82 | .36***             | .05         |
| e. Who is important to you (e.g., family, friends)?                                                                                   | 2.59            | 2.71 | .12                | 2.29                | 2.78 | .49***             | -.37*       |
| f. What you worry about?                                                                                                              | 2.59            | 2.70 | .11                | 2.57                | 2.79 | .23                | -.12        |
| g. What you like to be called?                                                                                                        | 2.52            | 2.70 | .18                | 2.69                | 2.56 | -.13               | .31         |
| <b>Domain 5: Autonomy/Choice</b>                                                                                                      |                 |      |                    |                     |      |                    |             |
| a. Get up when you want to?                                                                                                           | 2.40            | 2.71 | .31*               | 2.62                | 2.82 | .20                | .11         |
| b. Eat meals when you want to?                                                                                                        | 2.56            | 2.75 | .19                | 2.62                | 2.61 | -.01               | .20         |
| c. Take a shower or a bath when you want to?                                                                                          | 2.42            | 2.84 | .42***             | 2.63                | 2.77 | .14                | .28         |
| d. Make your own decisions even if others don't approve (e.g., eating foods not on your diet, taking or not taking some medications)? | 2.41            | 2.73 | .32*               | 2.67                | 2.58 | -.09               | .41*        |
| e. Spend your time the way you want to?                                                                                               | 2.51            | 2.71 | .20                | 2.38                | 2.75 | .36**              | -.16        |
| f. Have privacy when you want it?                                                                                                     | 2.46            | 2.75 | .28**              | 2.62                | 2.50 | -.12               | .40         |

|                                                                                                                                             | Important: Very |      |                    | Important: Not/Some |      |                    | Interaction |
|---------------------------------------------------------------------------------------------------------------------------------------------|-----------------|------|--------------------|---------------------|------|--------------------|-------------|
|                                                                                                                                             | N-S             | Yes  | Diff. <sup>a</sup> | N-S                 | Yes  | Diff. <sup>a</sup> | Sig.        |
| g. Can do things for yourself?                                                                                                              | 2.40            | 2.72 | .32**              | 2.42                | 2.75 | .33                | -.01        |
| h. Have a say in how this place works (e.g., meal schedules, decorating communal areas, planning social events, hiring & evaluating staff)? | 2.52            | 3.01 | .48***             | 2.59                | 2.80 | .22*               | .27         |
| i. Feel free to express your opinions about things you do not like here?                                                                    | 2.48            | 2.71 | .23                | 2.47                | 2.58 | .12                | .11         |
| <b>Domain 6: Treated Like a Person</b>                                                                                                      |                 |      |                    |                     |      |                    |             |
| a. Pay attention to your opinions?                                                                                                          | 2.41            | 2.83 | .42***             | 2.44                | 2.57 | .13                | .29         |
| b. Show that they are interested in you as a person?                                                                                        | 2.45            | 2.81 | .37**              | 2.34                | 2.66 | .32**              | .04         |
| c. Listen to you without interrupting?                                                                                                      | 2.27            | 2.75 | .48**              | 2.65                | 2.69 | .05                | .43*        |
| d. Show that your needs are important to them?                                                                                              | 2.47            | 2.80 | .33*               | 2.25                | 2.61 | .36**              | -.03        |
| e. Understand what it is like for you to live here?                                                                                         | 2.47            | 2.82 | .35***             | 2.52                | 2.65 | .13                | .22         |
| f. Answer your questions?                                                                                                                   | 2.34            | 2.75 | .40**              | 2.51                | 2.72 | .20                | .20         |
| g. Treat you with respect?                                                                                                                  | 2.20            | 2.73 | .54***             | 2.37                | 2.64 | .27                | .27         |
| h. Treat you with kindness?                                                                                                                 | 2.26            | 2.73 | .47*               | 2.44                | 2.49 | .05                | .42         |
| <b>Domain 7: Relationship with Staff</b>                                                                                                    |                 |      |                    |                     |      |                    |             |
| a. Listen to you share stories about your life?                                                                                             | 2.60            | 2.78 | .18                | 2.52                | 2.70 | .19                | -.01        |
| b. Tell you about their personal lives?                                                                                                     | 2.72            | 2.76 | .05                | 2.57                | 2.75 | .18                | -.13        |
| c. Talk to you about things you are interested in?                                                                                          | 2.65            | 2.83 | .18                | 2.47                | 2.78 | .31**              | -.13        |
| d. Spend time with you just talking or being with you?                                                                                      | 2.47            | 2.91 | .43***             | 2.56                | 2.72 | .16                | .28         |
| e. Know what you have done in your life?                                                                                                    | 2.58            | 2.77 | .19                | 2.61                | 2.70 | .09                | .10         |
| f. Have things in common with you?                                                                                                          | 2.63            | 3.04 | .40**              | 2.55                | 2.81 | .27*               | .14         |
| g. Laugh with you?                                                                                                                          | 2.32            | 2.75 | .43*               | 2.44                | 2.70 | .26*               | .17         |
| <b>Domain 8: Organizational Environment</b>                                                                                                 |                 |      |                    |                     |      |                    |             |
| a. You can talk to the [owner/ manager/administrator] if you have a problem?                                                                | 2.52            | 2.74 | .22                | 2.42                | 2.70 | .29                | -.07        |

|                                                                     | Important: Very |      |                    | Important: Not/Some |      |                    | Interaction |
|---------------------------------------------------------------------|-----------------|------|--------------------|---------------------|------|--------------------|-------------|
|                                                                     | N-S             | Yes  | Diff. <sup>a</sup> | N-S                 | Yes  | Diff. <sup>a</sup> | Sig.        |
| b. You see the [owner/manager/ administrator] around the home?      | 2.49            | 2.74 | .26                | 2.55                | 2.73 | .17                | .08         |
| c. The same people help you on most days?                           | 2.61            | 2.64 | .04                | 2.63                | 2.67 | .04                | -.01        |
| d. You have a say in who works here?                                | 2.46            | 2.92 | .46*               | 2.66                | 2.77 | .12                | .35         |
| e. The people who work here have time to help you when you need it? | 2.43            | 2.82 | .39***             | 2.44                | 2.61 | .17                | .22         |
| f. The people who work here have a good attitude?                   | 2.38            | 2.73 | .35***             | 2.43                | 2.60 | .17                | .18         |
| g. This place is run well?                                          | 2.33            | 2.82 | .49***             | 2.31                | 2.49 | .18                | .31         |

*Note.* All means are weighted and all ns in parentheses are unweighted. N-S: no (not at all) or some receipt.

<sup>a</sup>Based on ordinary least squares (OLS) linear regression results incorporating design weights.

\* p<.05, \*\* p<.01, \*\*\* p<.001.
